# Supplementary material for: Innovative visualization of the effects of crystal morphology on semiconductor photocatalysts. Tuning the Hückel polarity of the shape-tailoring agents: the case of Bi2WO6
Source: Royal Society of Chemistry journal article supplement (doi:10.1039/c8ce01744a), 2019-01-01
Supplement: c8ce01744a1.pdf [file c8ce01744a1.pdf]

## Supporting Information

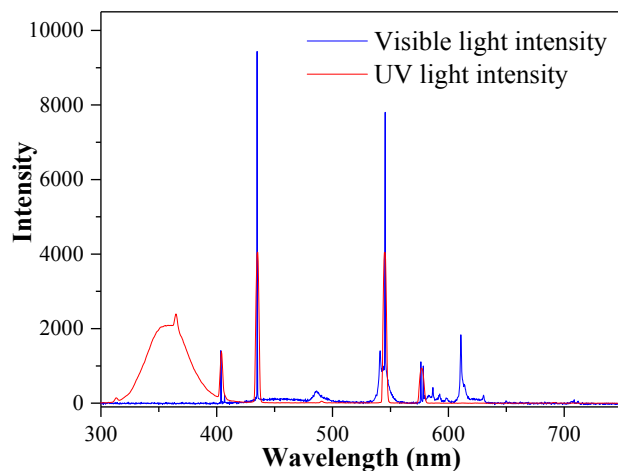

**Figure S1**– The spectrum of the two lamp types applied during the photocatalytic tests

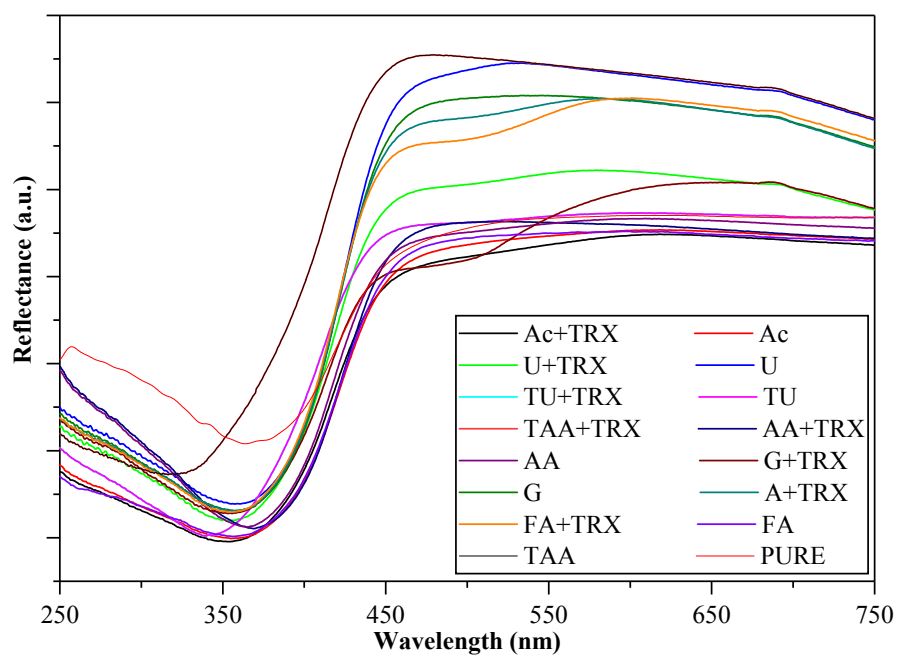

**Figure S2**– The spectrum of the two lamp types applied during the photocatalytic tests
